# Supplementary material for: Health Insurance Coverage and the Receipt of Specialty Treatment for Substance Use Disorders Among U.S. Adults
Source: Atypon-hosted journal article supplement (doi:10.1176/appi.ps.201300443), 2014-08-01
Supplement: 1070_ds001.pdf [file 1070_ds001.pdf]

Online Supplement Table: Perceived Barriers to Substance Use Disorder Treatment by Insurance Status among U.S. Non-Elderly Adults

| Alcohol Abuse/Dependence<br>Unmet Need Subsample       | Uninsured <sup>a</sup> | Private<br>Insurance<br>With Coverage <sup>b</sup> | Private<br>Insurance<br>No Coverage <sup>c</sup> | Private<br>Insurance<br>Coverage Unkn. <sup>d</sup> | Medicaid <sup>e</sup> | Other<br>Insurance <sup>f</sup> |
|--------------------------------------------------------|------------------------|----------------------------------------------------|--------------------------------------------------|-----------------------------------------------------|-----------------------|---------------------------------|
|                                                        | %                      | %                                                  | %                                                | %                                                   | %                     | %                               |
| <i>Not Ready to Stop</i>                               | 33.4                   | 49.0                                               | 35.2                                             | 50.0                                                | 47.2                  | 23.4                            |
| <i>Financial Barriers</i> <sup>§</sup>                 | 58.5                   | 22.7***                                            | 39.1                                             | 12.7***                                             | 40.3                  | 47.3                            |
| <i>Navigation Issues</i> <sup>†</sup>                  | 8.1                    | 21.2*                                              | 25.7                                             | 31.5*                                               | 17.1                  | 15.1                            |
| <i>Treatment might have negative<br/>effect on job</i> | 9.9                    | 18.2                                               | 9.4                                              | 28.6                                                | 8.1                   | 13.6                            |
| <i>Concerned about Image</i> <sup>‡</sup>              | 7.8                    | 11.7                                               | 9.4                                              | 23.1                                                | 11.1                  | 13.8                            |
| <i>Transportation Difficulty</i> <sup>±</sup>          | 10.0                   | 3.5                                                | 14.2                                             | 14.8                                                | 6.7                   | 1.1**                           |
| <i>No Openings in Treatment Program</i>                | 0.7                    | 3.3                                                | 3.6                                              | 0.0                                                 | 1.4                   | 6.0                             |

  

| Drug Abuse/Dependence<br>Unmet Need Subsample          | Uninsured <sup>g</sup> | Private<br>Insurance<br>With Coverage <sup>h</sup> | Private<br>Insurance<br>No Coverage <sup>i</sup> | Private<br>Insurance<br>Coverage Unkn. <sup>j</sup> | Medicaid <sup>k</sup> | Other<br>Insurance <sup>l</sup> |
|--------------------------------------------------------|------------------------|----------------------------------------------------|--------------------------------------------------|-----------------------------------------------------|-----------------------|---------------------------------|
|                                                        | %                      | %                                                  | %                                                | %                                                   | %                     | %                               |
| <i>Not Ready to Stop</i>                               | 24.8                   | 34.4                                               | 41.0                                             | 33.3                                                | 35.0                  | 8.8**                           |
| <i>Financial Barriers</i> <sup>§</sup>                 | 63.6                   | 32.3**                                             | 45.9                                             | 23.3***                                             | 45.0                  | 46.6                            |
| <i>Navigation Issues</i> <sup>†</sup>                  | 17.5                   | 18.3                                               | 41.3                                             | 31.1                                                | 20.6                  | 13.9                            |
| <i>Treatment might have negative<br/>effect on job</i> | 12.2                   | 32.3*                                              | 3.7*                                             | 19.3                                                | 3.6*                  | 5.3                             |
| <i>Concerned about Image</i> <sup>‡</sup>              | 15.4                   | 17.0                                               | 5.3*                                             | 23.7                                                | 15.4                  | 17.1                            |
| <i>Transportation Difficulty</i> <sup>±</sup>          | 9.2                    | 7.3                                                | 7.6                                              | 0.0**                                               | 17.7                  | 4.2                             |
| <i>No Openings in Treatment Program</i>                | 2.3                    | 3.9                                                | 2.6                                              | 0.9                                                 | 4.6                   | 1.2                             |

Notes: Data come from the National Survey of Drug Use and Health, 2005-2009. Respondents who reported that they perceived a need for treatment but did not receive services were asked about perceived barriers to receiving treatment or counseling for their substance use (alcohol abuse/dependence subsample: n=670; drug abuse/dependence subsample: n= 609).

<sup>a</sup> n=246; <sup>b</sup> n= 135; <sup>c</sup> n= 49; <sup>d</sup> n= 93; <sup>e</sup> n= 96; <sup>f</sup> n= 51; <sup>g</sup> n= 239; <sup>h</sup> n= 94; <sup>i</sup> n= 42; <sup>j</sup> n= 70; <sup>k</sup> n= 122; <sup>l</sup> n= 42

Weighted percentages of barrier endorsement are presented. Adjusted Wald tests account for survey design elements of NSDUH and compare the percentage in each insurance category that endorsed a specific barrier to the percentage of uninsured respondents that endorsed the same barrier.

\* $p < 0.05$ , \*\* $p < 0.01$ , \*\*\* $p < 0.001$ .

<sup>§</sup>Financial barriers (i.e., not able to afford treatment or no health insurance coverage; health insurance does not provide coverage for treatment)

<sup>†</sup>Navigational barriers (i.e., did not know where to get treatment; treatment not found for the type of program wanted)

<sup>‡</sup>Concerned about image (i.e., treatment might cause neighbors to have negative opinion; not wanting others to find out)

<sup>±</sup>No transportation, too far away, or not convenient to get there
